# Supplementary material for: Exploring family caregivers' experiences of caring for stroke survivors: A systematic review and meta-synthesis
Source: Research Square preprint supplement (doi:10.21203/rs.3.rs-8481238/v1), 2026-01-25
Supplement: Supplementary file 1 [file e52dabb3c86f79101aa2aaab.docx]

### Appendix 3: Data Extraction sheet

| **Full reference** | **Number of**  **participants** | **Study method** | **Aim** | **Conclusions** | **Themes** |
| --- | --- | --- | --- | --- | --- |
| Liao *et al.* (2024) | 12 dyads of stroke survivors and family caregivers  (Age 30-84) | -A ethnographic qualitative study  -Semi-  structured interviews | To explore the experience of long-term care services from the perspective of stroke survivors and their family carers in indigenous and non-indigenous communities | LTC services are essential in enabling biographical continuation because they let stroke victims engage in social activities and lessen the strain of multitasking placed on family carers. | -Four mindsets:  loss and worry,  sense of interdependence,  sense of independence,  wellbeing  -three status:  acceptance,  alteration  identification |
| Sajwani-Merchant *et al.* (2023) | 10 stroke victims and their car-egivers (Age 37-87) | -A phenomenological qualitative study  -semi-  structured interviews | To understand the role of social support available to stroke carers | -Stress following a stroke may change the duties of those who provide care for the patient.  -Social support and support groups play a crucial role in helping family caregivers deal with the challenges of caring. | -Response to Stroke:  ①Work Life Balance,  ②Reaction of Other People or Family to Stroke,  ③Expectations and Responsibility from Caregivers.  **-**Stress and Coping:  ①Impact of Stroke on Abilities of Victim,  ②Stressors and Concerns for the Caregivers,  ③Strategies used by Caregivers to Cope with Stress,④Role of Support Group and Social Support to Stroke Caregiver and Care Recipient |
| Haque *et al.* (2023) | 15 family caregivers of stroke survivors (Age 19-50) | -A qualitative descriptive  approach  -semi-  structured interviews | To explore perceptions  of using long-term care services for stroke survivors by  their family caregivers in Bangladesh. | -Nurses, clinical administrators, and social workers can use the study's findings to better understand the needs of stroke survivors.  -Family carers should be trained by healthcare professionals to fulfil the requirements of stroke survivors after they are released from the hospital. | -Understanding of long-term care  -The challenges of  providing care  -Long-term care services: a vital source of assistance  -Both advantages and disadvantages of adopting long-term care services |
| Malewezi *et al.* (2022) | 16 family caregivers of stroke survivors (Age 36-76) | -A phenomenological qualitative study  -semi-  structured interviews | To explore the experiences of  family caregivers of stroke survivors following the introduction  of the Care Act 2014. | -Family carers of stroke survivors still face considerable problems.  -Informing the development of a screening tool for family caregivers of stroke survivors | -The effects of caregiving: Physical, emotional and socio-economic  -The unmet needs of family carers for information, respite and support |
| Lin *et al.* (2022) | 23 stroke survivor/  caregiver dyads (Age 37-75) | A prospective, qualitative longitudinal study  -semi-  structured interviews | To evaluate the experience of stroke survivors and their family caregivers during hospital-to  home transitional care in China. | Research findings contribute to favourable policies for transition of care from hospital to home.  -Collaboration with health professionals, accessible rehabilitation services, post-discharge follow-up support and available community and social support favour transitional care | -survived:  the optimism and hope  -living in the mist:  lack knowledge and information, difficulties of performing home-based healthcare, expectation of hospital pre-discharge  -crisis at home:  stress, hard-to-get support, interpersonal relationship disruption, lifestyle changes, financial burdens |
| Lu *et al.* (2022) | 26 eligible family caregivers of stroke survivors (Age 27-82) | -A deductive qualitative  -semi-  structured interviews | To deductively explore the needs of family members caring for stroke survivors in China. | -Family carers of stroke survivors in China have multiple needs  -If CTI-25 is used in mainland China, cultural adjustments and modifications should be made | -Learning to cope with a new role  -Providing care according to care‑receiver’s needs  -Managing one’s own emotional needs  -Appraising supportive resources  -Balancing caregiving needs and own needs  -Direct and indirect fnancial needs |
| Lu *et al.* (2019) | 26 family caregivers of stroke survivors (Age 27-82) | -Qualititive:  An explorative design  -semi-  structured interviews | To explore the experience of family caregivers taking care of stroke  survivors in China. | The Government and society should plan and implement effective support to free them from the pain of caring for their stroke relatives and to maintain their own quality of life. | -Having total responsibility  -Being all alone  -Drained by caregiving  -Being a prisoner in their own life  -Being uncertain about the future |
| Atsu FS *et al*. (2024) | 37 family caregivers of stroke survivors (Age 20-63) | -Qualititive:  Interview guide and descriptive phenomenologic-al | The purpose of the study was to examine the lived experiences of family caregivers of cerebrovascular accident  survivors in the Ho Municipality in the Volta Region of Ghana. This aims are to establish their caregivers’ knowledge,  preparedness, and impact of caregiving on the caregiver, and coping strategies caregivers adopted. | -Caregivers suffered broken relationship, loss their jobs and incomes due to their caregiving roles. Moreover, some engaged in fasting and prayers, and alcohol use to cope with the stress associated with caring for the cerebrovascular accident survivors. We discussed the potential implications of our findings on the realisation of the Sustainable Development Goal 3.4. The aim of this goal is to reduce by 75% premature deaths due to cerebrovascular  and other non-communicable diseases by 2030. | -Ill-prepared caregiver roles  -Barriers confronted by caregivers: sub-themes  -The cost of caregiver roles on carers  -Inadequate coping strategies and poor  knowledge |
